# Supplementary material for: Before Becoming a World Heritage: Spatiotemporal Dynamics and Spatial Dependency of the Soundscapes in Kulangsu Scenic Area, China
Source: MDPI journal article supplement (doi:10.3390/f13091526), 2022-09-19
Supplement: s1 [file s1]

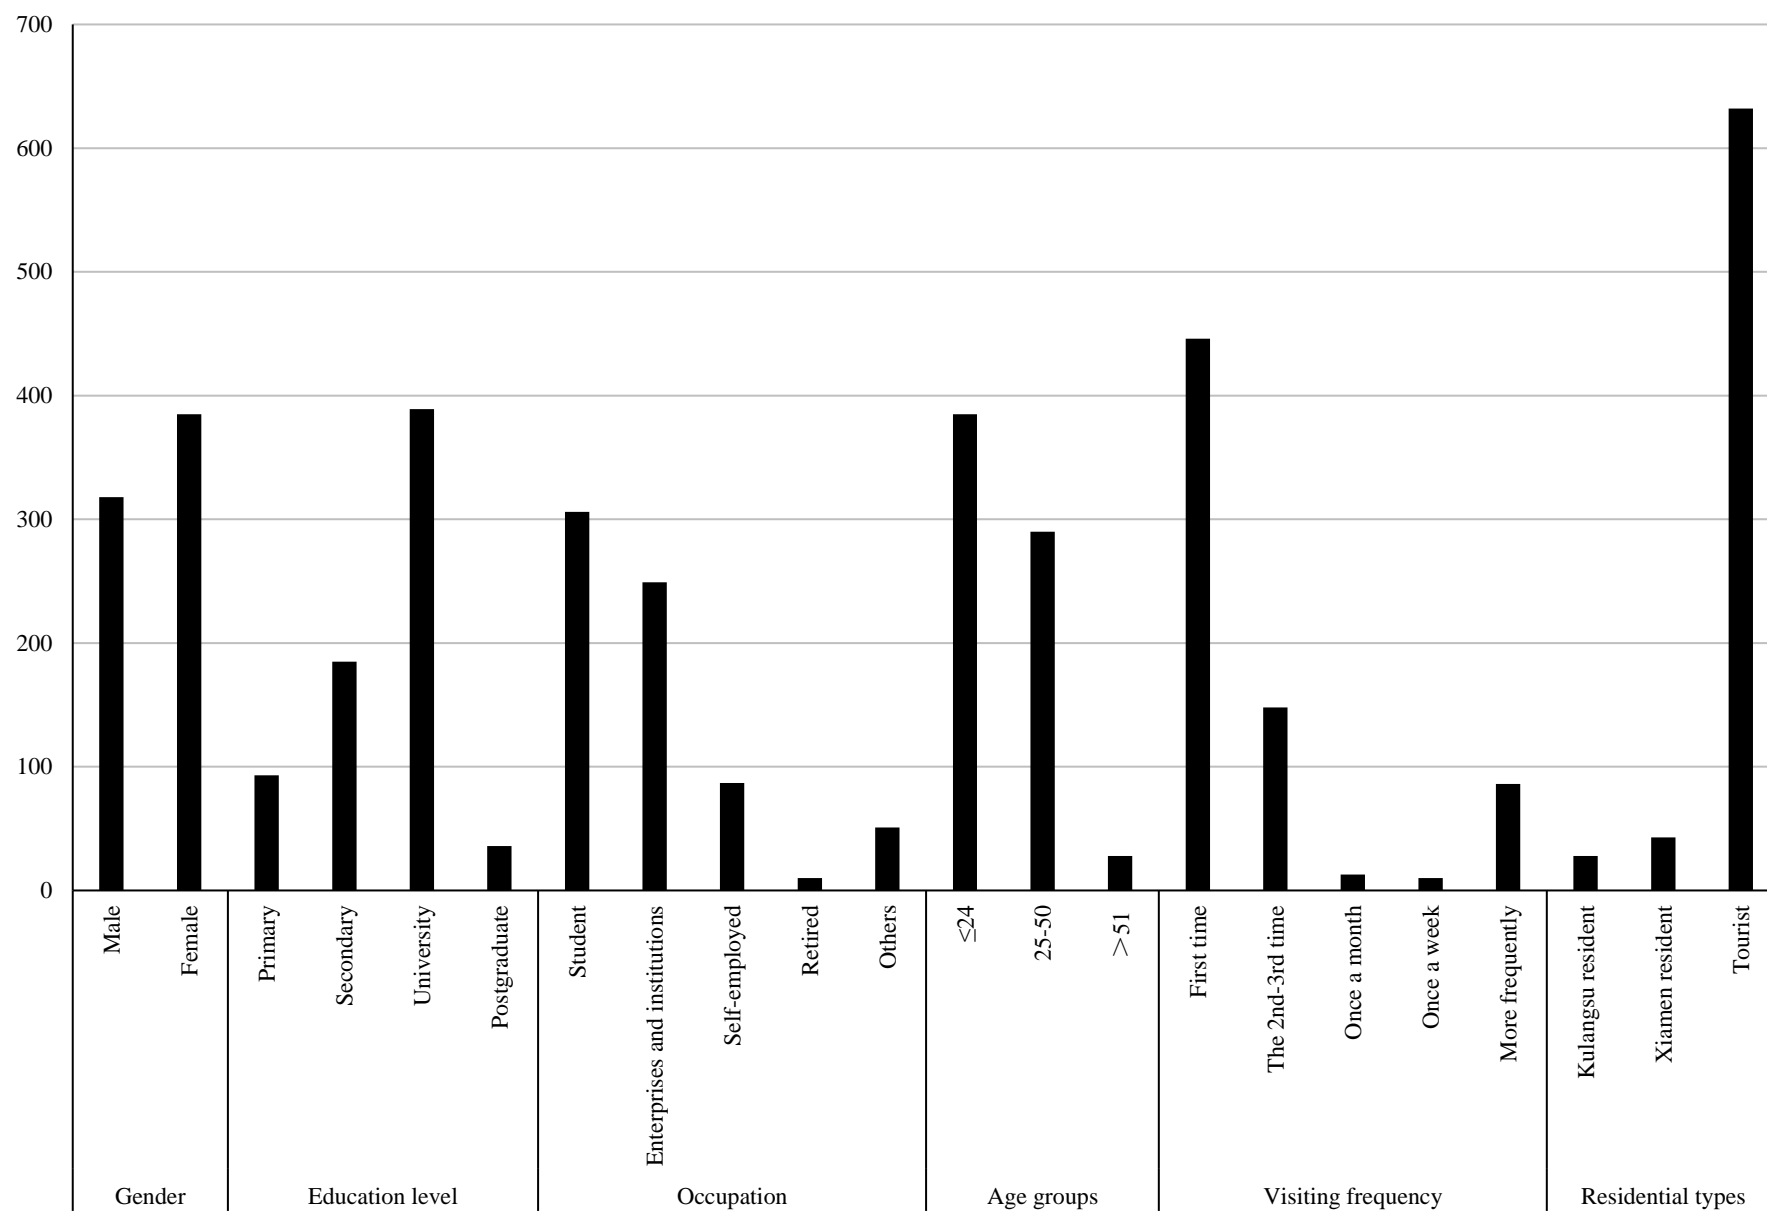

**Figure S1** Social/demographical/behavioral information of the interviewees

**Table S1** Calculated landscape spatial indices at class and landscape levels

| Landscape Index                       | Code  | Comments                                                                                                                                                                                                      | Formula                                                                                                                                                                         |                                                                                                                                                                    |
|---------------------------------------|-------|---------------------------------------------------------------------------------------------------------------------------------------------------------------------------------------------------------------|---------------------------------------------------------------------------------------------------------------------------------------------------------------------------------|--------------------------------------------------------------------------------------------------------------------------------------------------------------------|
|                                       |       |                                                                                                                                                                                                               | Class metrics                                                                                                                                                                   | Landscape metrics                                                                                                                                                  |
| Class Area                            | CA    | Class area is a measure of landscape composition. Specifically, how much of the landscape is comprised of a particular patch type.                                                                            | $CA = \sum_{j=1}^n a_{ij} \left( \frac{1}{10000} \right)$                                                                                                                       | /                                                                                                                                                                  |
| Edge Density                          | ED    | Edge density reports edge length on a per unit area basis that facilitates comparison among landscapes of varying size.                                                                                       | $ED = \frac{\sum_{k=1}^m e_{ik}}{A} \cdot (10000)$                                                                                                                              | /                                                                                                                                                                  |
| Patch Density                         | PD    | Patch density has the same basic utility as number of patches as an index, except that it expresses number of patches on a per unit area basis that facilitates comparisons among landscapes of varying size. | $PD = \frac{n_i}{A} \cdot (10000) \cdot (100)$                                                                                                                                  | $PD = \frac{N}{A} \cdot (10000) \cdot (100)$                                                                                                                       |
| Effective Mesh Size                   | MESH  | Mesh is based on the cumulative patch area distribution and is interpreted as the size of the patches when the landscape is subdivided into S patches, where S is the value of the splitting index.           | $MESH = \frac{\sum_{i=1}^m \sum_{j=1}^n a_{ij}^2}{A} \cdot \left( \frac{1}{10000} \right)$                                                                                      | $MESH = \frac{\sum_{i=1}^m \sum_{j=1}^n a_{ij}^2}{A}$                                                                                                              |
| Interspersion and Juxtaposition Index | IJI   | Interspersion and juxtaposition index reflects the dispersion and juxtaposition between patches.                                                                                                              | $IJI = \frac{-\sum_{k=1}^m \left[ \left( \frac{e_{ik}}{\sum_{k=1}^m e_{ik}} \right) \cdot \ln \left( \frac{e_{ik}}{\sum_{k=1}^m e_{ik}} \right) \right]}{\ln(m-1)} \cdot (100)$ | $IJI = \frac{-\sum_{i=1}^m \sum_{k=i+1}^m \left[ \left( \frac{e_{ik}}{E} \right) \cdot \ln \left( \frac{e_{ik}}{E} \right) \right]}{\ln(0.5[m(m-1)])} \cdot (100)$ |
| Splitting Index                       | SPLIT | Split is based on the cumulative patch area distribution and is interpreted as the effective mesh number, or number of patches with a constant patch size when the landscape is subdivided into S             | $SPLIT = \frac{A^2}{\sum_{i=1}^m \sum_{j=1}^n a_{ij}^2}$                                                                                                                        | $SPLIT = \frac{A^2}{\sum_{i=1}^m \sum_{j=1}^n a_{ij}^2}$                                                                                                           |

| Landscape Index           | Code     | Comments                                                                                                                                                                           | Formula | Landscape metrics                                                                                                                                          |
|---------------------------|----------|------------------------------------------------------------------------------------------------------------------------------------------------------------------------------------|---------|------------------------------------------------------------------------------------------------------------------------------------------------------------|
|                           |          | patches, where S is the value of the splitting index.                                                                                                                              |         |                                                                                                                                                            |
| Landscape Shape Index     | LSI      | Landscape shape index provides a standardized measure of total edge or edge density that adjusts for the size of the landscape.                                                    | /       | $LSI = \frac{0.25E}{\sqrt{A}}$                                                                                                                             |
| Shannon's Diversity Index | SHDI     | Shannon's diversity index is a popular measure of diversity in community ecology, applied here to landscapes. It reflects the uneven distribution of patch types in the landscape. | /       | $SIDI = 1 - \sum_{i=1}^m P_i^2$                                                                                                                            |
| Patch Cohesion Index      | COHESION | Patch cohesion index measures the physical connectedness of the corresponding patch type.                                                                                          | /       | $COHESION = \left[ 1 - \frac{\sum_{i=1}^n P_{ij}}{\sum_{j=1}^n P_{ij} \sqrt{a_{ij}}} \right] \cdot \left[ 1 - \frac{1}{\sqrt{Z}} \right]^{-1} \cdot (100)$ |

**Table S2** Results of multicollinearity diagnosis for pleasantness and eventfulness at each sampling period (The same results for pleasantness and eventfulness)

| Sampling period | Independent variable   |           | Multicollinearity diagnostics |       |
|-----------------|------------------------|-----------|-------------------------------|-------|
|                 | Category               | Indicator | Tolerance                     | VIF   |
| P1              | Perceived sound source | SDD_BS    | 0.482                         | 2.073 |
|                 |                        | SDD_GS    | 0.556                         | 1.797 |
|                 |                        | SDD_HS    | 0.278                         | 3.602 |
|                 |                        | SDD_MS    | 0.297                         | 3.372 |
|                 | Landscape satisfaction | SNL       | 0.323                         | 3.093 |
|                 |                        | SHB       | 0.285                         | 3.508 |
|                 |                        | SVA       | 0.236                         | 4.243 |
|                 | Green space feature    | NDVI      | 0.301                         | 3.322 |
|                 | Landscape pattern      | CM_GS_PD  | 0.244                         | 4.106 |
|                 |                        | CM_GS_IJI | 0.276                         | 3.625 |

| Sampling period | Independent variable   |             | Multicollinearity diagnostics |       |
|-----------------|------------------------|-------------|-------------------------------|-------|
|                 | Category               | Indicator   | Tolerance                     | VIF   |
| P2              |                        | CM_GS_SPLIT | 0.69                          | 1.449 |
|                 |                        | LM_PD       | 0.29                          | 3.445 |
|                 |                        | LM_IJI      | 0.203                         | 4.934 |
|                 | Perceived sound source | SDD_BS      | 0.298                         | 3.361 |
|                 |                        | SDD_GS      | 0.289                         | 3.466 |
|                 |                        | SDD_HS      | 0.303                         | 3.298 |
|                 |                        | SDD_MS      | 0.201                         | 4.979 |
|                 | Landscape satisfaction | SNL         | 0.395                         | 2.529 |
|                 |                        | SLD         | 0.37                          | 2.704 |
|                 |                        | SHB         | 0.225                         | 4.437 |
|                 |                        | SSF         | 0.253                         | 3.955 |
|                 | Green space feature    | SVA         | 0.402                         | 2.487 |
|                 |                        | DtGS        | 0.23                          | 4.343 |
|                 |                        | NDVI        | 0.403                         | 2.479 |
|                 | Landscape pattern      | CM_GS_IJI   | 0.224                         | 4.461 |
|                 |                        | CM_GS_SPLIT | 0.656                         | 1.525 |
|                 |                        | LM_PD       | 0.268                         | 3.735 |
|                 |                        | LM_LSI      | 0.238                         | 4.209 |
| P3              | Perceived sound source | SDD_BS      | 0.585                         | 1.709 |
|                 |                        | SDD_GS      | 0.334                         | 2.992 |
|                 |                        | SDD_HS      | 0.533                         | 1.876 |
|                 |                        | SDD_MS      | 0.525                         | 1.905 |
|                 | Landscape satisfaction | SNL         | 0.219                         | 4.563 |
|                 |                        | SLD         | 0.238                         | 4.201 |
|                 |                        | SHB         | 0.428                         | 2.339 |
|                 |                        | SVA         | 0.289                         | 3.464 |
|                 | Green space feature    | DtGS        | 0.254                         | 3.931 |
|                 |                        | NDVI        | 0.416                         | 2.402 |
|                 | Landscape pattern      | CM_GS_PD    | 0.225                         | 4.437 |

| Sampling period | Independent variable   |             | Multicollinearity diagnostics |       |
|-----------------|------------------------|-------------|-------------------------------|-------|
|                 | Category               | Indicator   | Tolerance                     | VIF   |
| Total           | Perceived sound source | CM_GS_IJI   | 0.282                         | 3.54  |
|                 |                        | CM_GS_SPLIT | 0.541                         | 1.847 |
|                 |                        | LM_PD       | 0.209                         | 4.78  |
|                 |                        | LM_IJI      | 0.216                         | 4.632 |
|                 | Landscape satisfaction | SDD_BS      | 0.579                         | 1.728 |
|                 |                        | SDD_GS      | 0.588                         | 1.702 |
|                 |                        | SDD_HS      | 0.469                         | 2.132 |
|                 |                        | SDD_MS      | 0.443                         | 2.257 |
|                 |                        | SNL         | 0.435                         | 2.299 |
|                 |                        | SLD         | 0.256                         | 3.903 |
|                 |                        | SHB         | 0.559                         | 1.787 |
|                 |                        | SSF         | 0.342                         | 2.924 |
|                 | Green space feature    | SVA         | 0.213                         | 4.697 |
|                 |                        | DtGS        | 0.254                         | 3.941 |
|                 |                        | NDVI        | 0.379                         | 2.638 |
|                 | Landscape pattern      | CM_GS_PD    | 0.271                         | 3.693 |
|                 |                        | CM_GS_IJI   | 0.297                         | 3.364 |
|                 |                        | CM_GS_SPLIT | 0.692                         | 1.444 |
|                 |                        | LM_PD       | 0.304                         | 3.294 |
|                 |                        | LM_IJI      | 0.216                         | 4.639 |

### Detailed concepts and definition in statistical analysis

**Accuracy test indicators ( $R^2$  and AIC):**  $R^2$  captures the percentage of variance of the dependent variable, indicating the explanatory ability of independent variables for the dependent variable [1]. AIC (Akaike Information Criterion) is an essential indicator for selecting the statistical models. The smaller the value of AIC means the better goodness of fit of the model and the more accurate model [2].

***Global spatial regression model:*** The ordinary least squares (OLS) estimation model was used in the present study. OLS model assumes that the coefficients or parameters are constant with respect to location, i.e., the spatial stability of the regression relationship [3]. Therefore, the model estimates the values of the dependent variable for the entire study area and produces only single values, such as the mean, standard deviation and a measure of the spatial autocorrelation of the data set [4].

***Local spatial regression model:*** The geographically weighted regression (GWR) model was employed in the study, which is an extension of OLS. It can simulate the local effects of spatial variables to reflect relatively realistic spatial features [5]. Therefore, it is able to generate corresponding regression estimates at different locations in the study area.

## References

1. Srivastava, A.K.; Srivastava, V.K.; Ullah, A. The coefficient of determination and its adjusted version in linear regression models. *Econometric reviews* **1995**, *14*, 229–240.
2. Hu, S. Akaike information criterion. *Center for Research in Scientific Computation* **2007**, 93.
3. Dismuke, C.; Lindrooth, R. Ordinary least squares. *Methods and Designs for Outcomes Research* **2006**, *93*, 93–104.
4. Nazeer, M.; Bilal, M. Evaluation of ordinary least square (OLS) and geographically weighted regression (GWR) for water quality monitoring: A case study for the estimation of salinity. *Journal of Ocean University of China* **2018**, *17*, 305–310.
5. Mennis, J. Mapping the results of geographically weighted regression. *The Cartographic Journal* **2006**, *43*, 171–179.
