# Supplementary material for: Before Becoming a World Heritage: Spatiotemporal Dynamics and Spatial Dependency of the Soundscapes in Kulangsu Scenic Area, China
Source: MDPI journal article supplement (doi:10.3390/f13091526), 2022-09-19
Supplement: s1 [file s1]

Archive with 1 entries (1 files):
- forests-1907110-supplementary.pdf
